# Supplementary material
Source: PubMed Central journal article supplement (PMC1291249)

## **Supplemental Material**

### **Mass spectrometry analyses of p300-acetylated c-Myc residues**

For mass spectrometry analysis of human c-Myc acetylated by p300 in vitro, recombinant human Myc:Max complex (8 pmol) was acetylated in HAT buffer in the presence of 50  $\mu$ M acetyl-CoA and 50ng recombinant p300 (full-length) for 30min/ 30  $^{\circ}$ C. Then, additional p300 and acetyl-CoA (50 ng and 50  $\mu$ M respectively) were added and the reaction was extended for additional 30 min/ 30  $^{\circ}$ C. This step was repeated once more and samples were prepared for mass spectrometry as described further below.

For identification of p300-acetylated residues on mouse c-Myc in vivo, HEK293 cells were transfected 3 times (at 4 h intervals) with 3 $\mu$ g pCbS-Flag-Myc and 5 $\mu$ g pCMV $\beta$ -p300-CHA. Before lysis, cells were incubated with medium containing HDAC inhibitors (10mM sodium butyrate, 10 mM nicotinamide, 2  $\mu$ M TSA) for 14 hours. Whole cell extracts were prepared 48 hours after the first transfection by using lysis buffer containing 10 mM nicotinamide and 2 $\mu$ M TSA. Cell extracts equivalent to seven 10-cm plates were adjusted to 500mM NaCl and Flag-Myc was immunoprecipitated by incubation with 35 $\mu$ l Flag M2 resin for 14 hours/4  $^{\circ}$ C, under constant rotation.

Flag-Myc immunoprecipitated from HEK293 cells and in vitro acetylated Myc proteins were resolved by SDS-PAGE in a 8-16% Tris-Glycine gel (Invitrogen), and stained with Colloidal Blue (Invitrogen). Bands were cut from the gel, in-gel trypsin digested, and analyzed by tandem mass spectrometry (MS/MS) essentially as previously described (Ref. S1).

**Reference S1:**

**Carter C., S. Pan, J. Zouhar, E.L. Avila, T. Girke, and N.V. Raikhel.** 2004. The vegetative vacuole proteome of *Arabidopsis thaliana* reveals predicted and unexpected proteins. *Plant Cell* **16**: 3285-3303.

**Figure legends.**

**Fig. S1.** Human c-Myc residue K148 (corresponding to mouse c-Myc K149) is a direct substrate for acetylation by p300 in vitro. MS/MS spectrum of fragmentation ions (y) is shown. The precursor ion and accuracy mass measurement (in ppm) are indicated.

**Fig. S2-S5.** Mouse c-Myc residues K149, K158, K317, and K323 are acetylated in HEK293 cells transfected with a p300 expression vector. The MS/MS spectra of fragmentation ions (y) for the different precursor ions detected are shown. For each precursor ion the sequence and accuracy mass measurement (in ppm) are indicated. Fig. S5 shows a precursor ion in which both K317 and K323 are acetylated.

# Fig. S1: Human c-Myc K148 acetylated in vitro

Precursor: 739.40, 2+

MS/MS mass error: 43 ppm

<sup>144</sup>LVSE**K-ac**LASYQAAR<sub>156</sub>

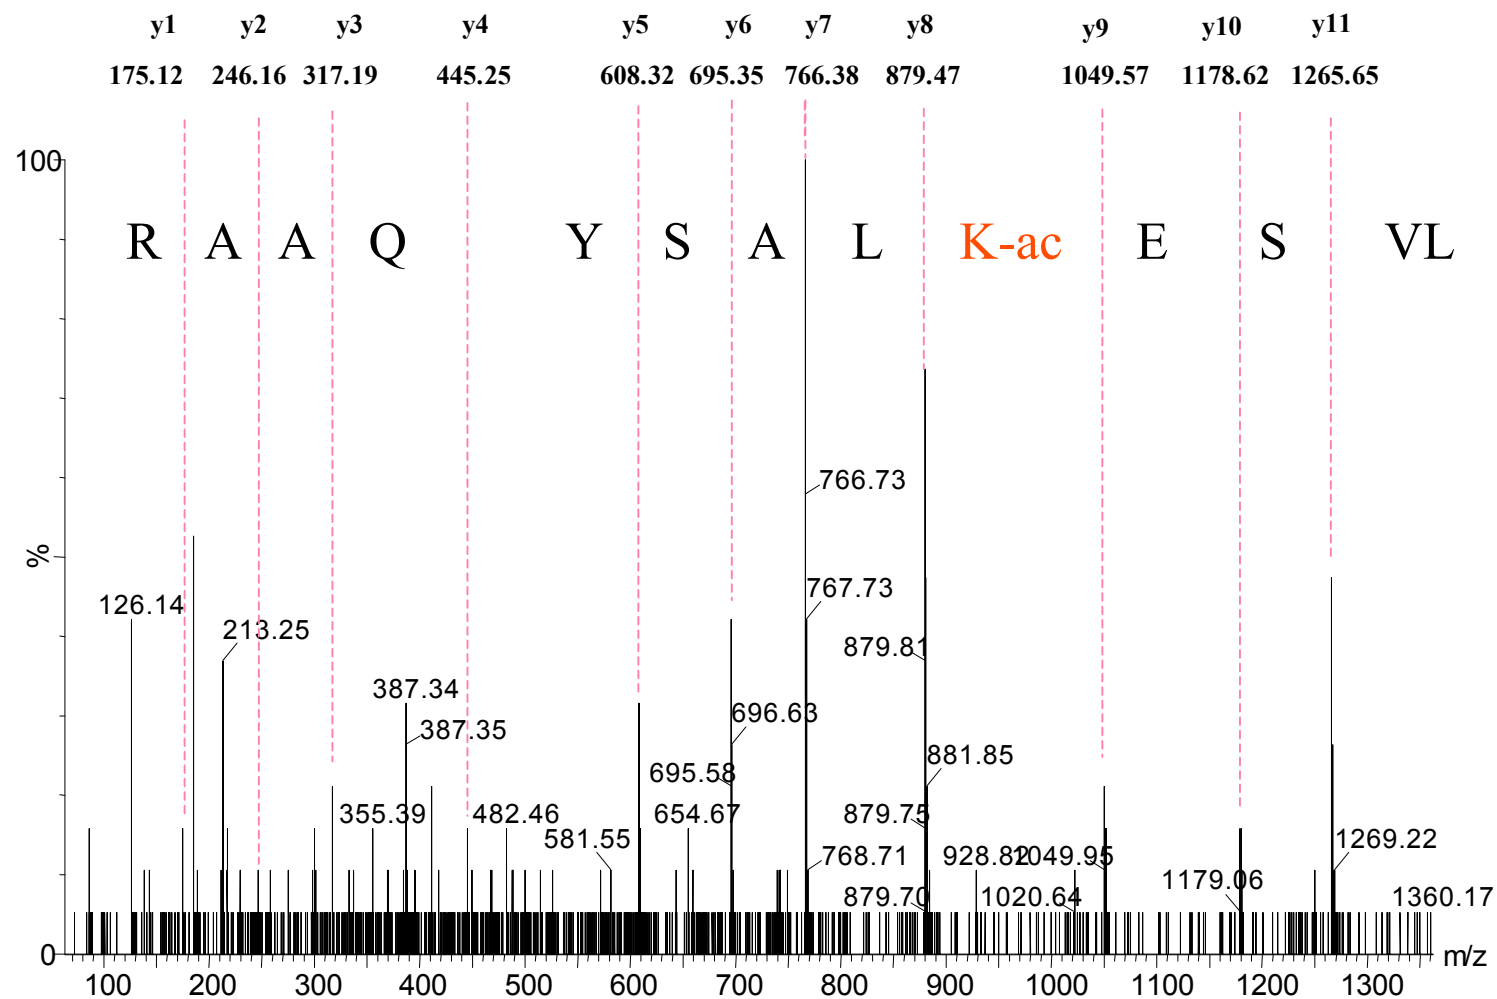

# Fig. S2: Mouse c-Myc K149 acetylated in HEK293 cells

Precursor: 739.39, 2+

MS/MS mass error: 40 ppm

<sup>145</sup>LVSE**K-ac**LASYQAAR<sub>157</sub>

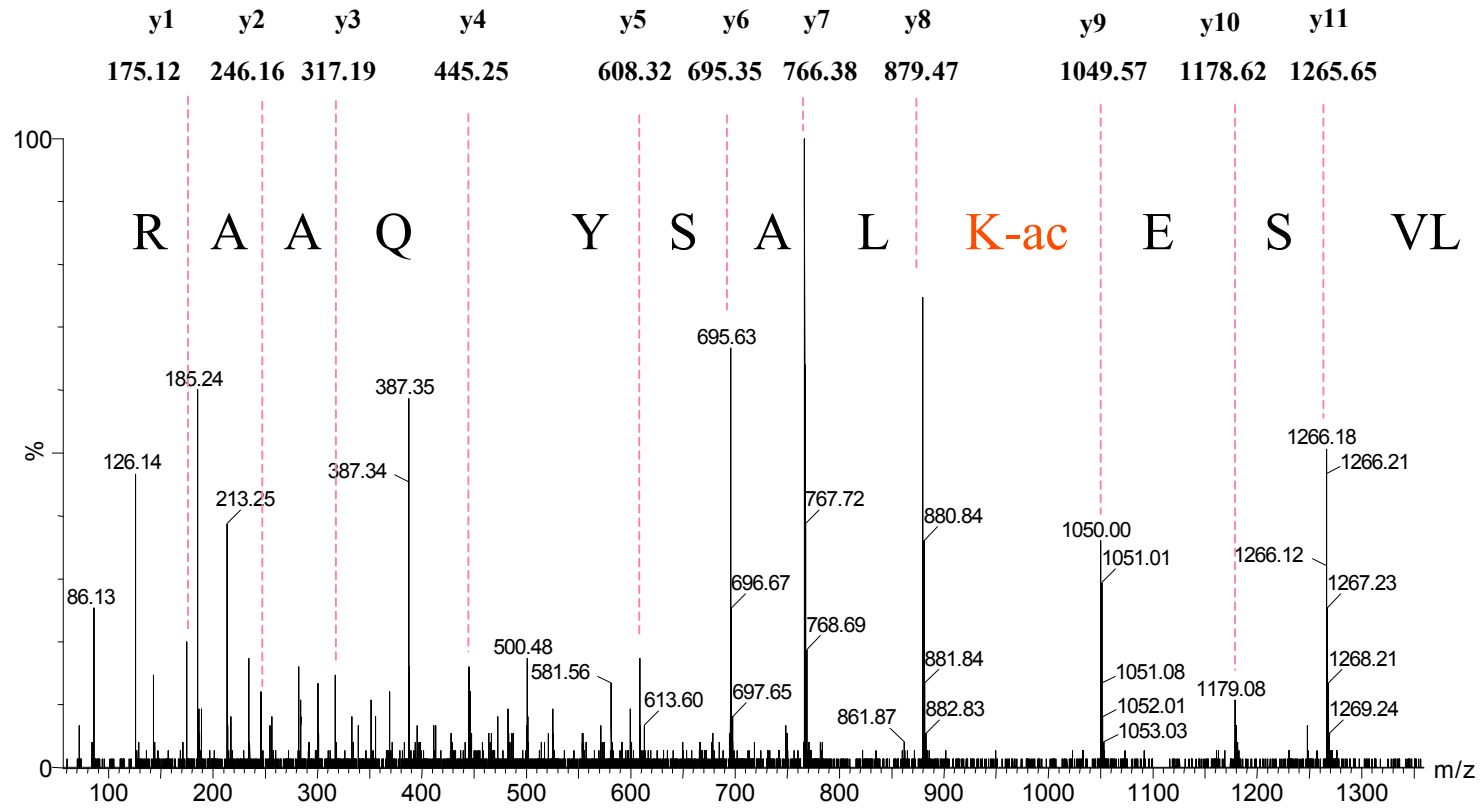

# Fig. S3: Mouse c-Myc K158 acetylated in HEK293 cells

Precursor: 552.29, 2+

<sup>158</sup>K-acDSTSLSPAR<sub>167</sub>

MS/MS mass error: 37 ppm

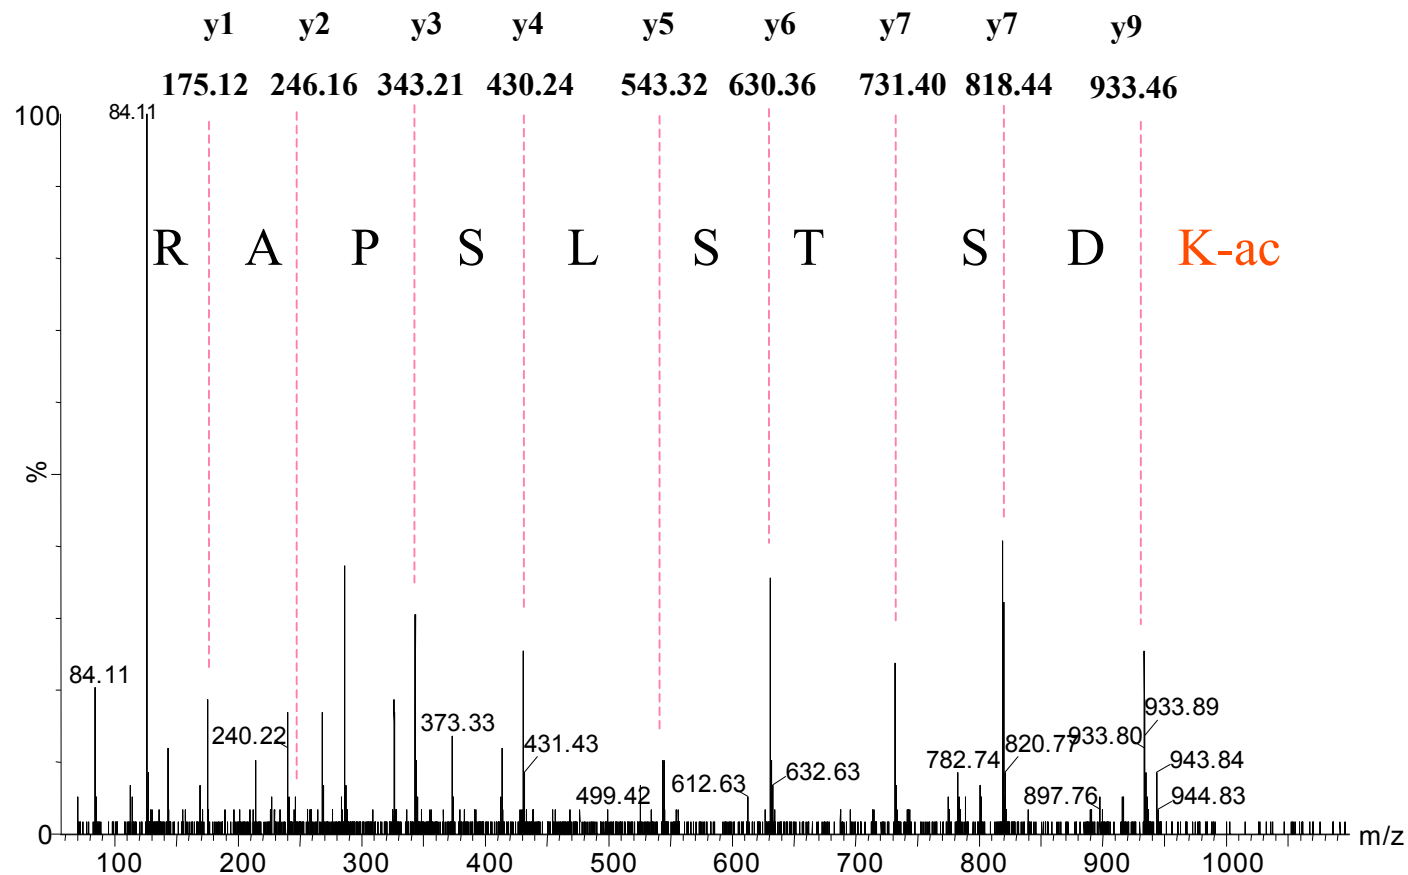

# Fig. S4: Mouse c-Myc K323 acetylated in HEK293 cells

Precursor: 495.76, 2+

<sup>317</sup>KDYPAAK-acR<sub>324</sub>

MS/MS mass error: 51 ppm

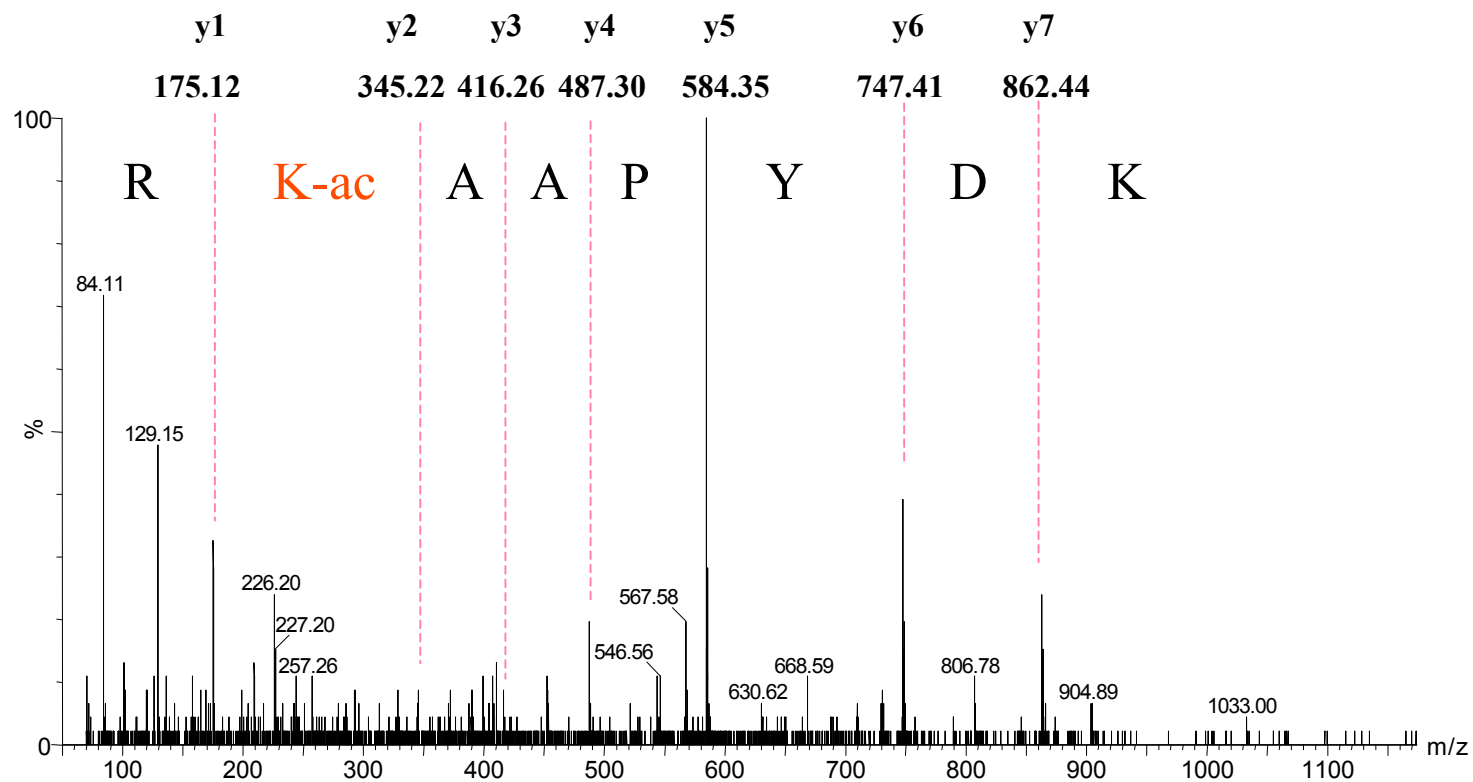

# Fig. S5: Mouse c-Myc K317 and K323 acetylated in HEK293 cells

Precursor: 516.78, 2+

<sup>317</sup>K-acDYPAAK-acR<sub>324</sub>

MS/MS mass error: 35 ppm

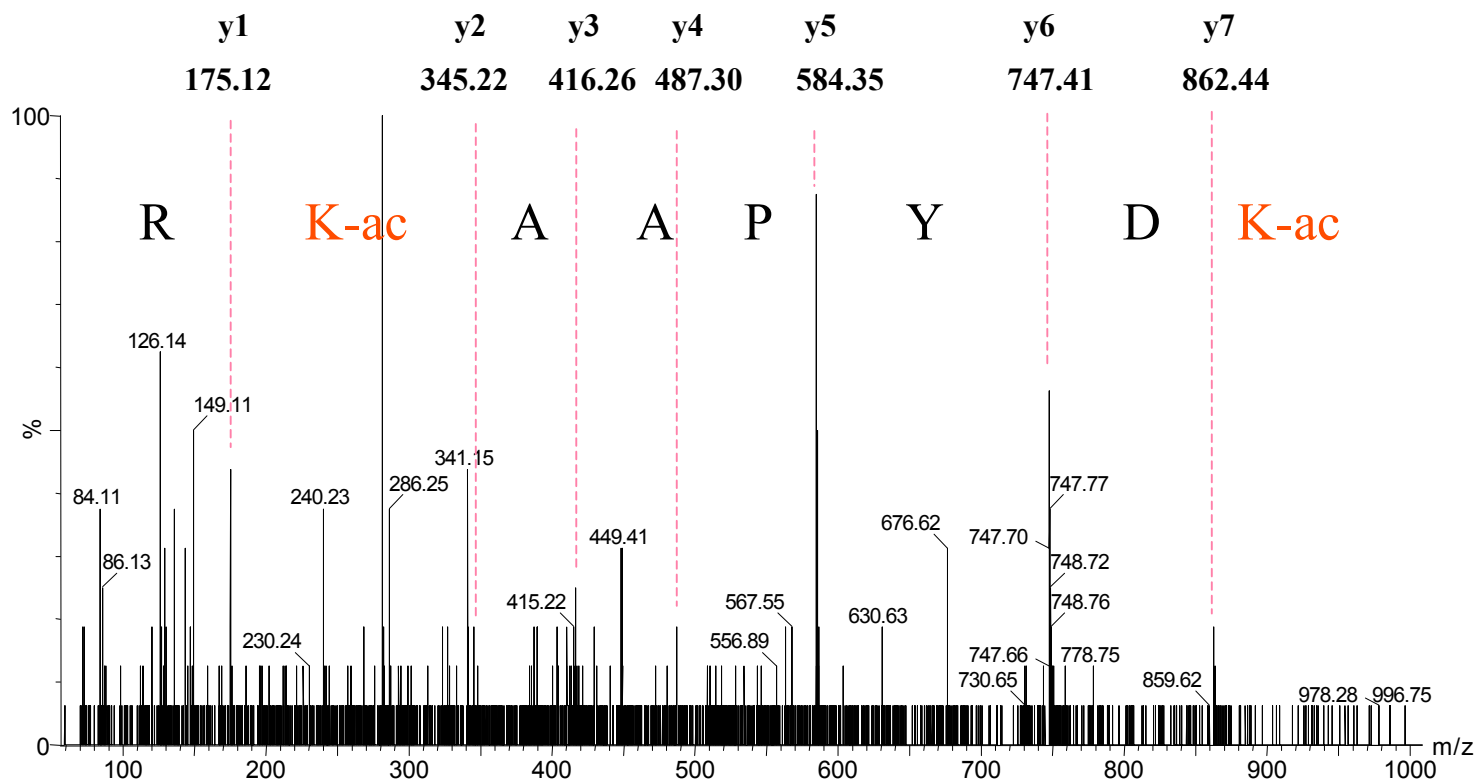

Supplement: molcellb_25_23_10220__1.pdf [file molcellb_25_23_10220__1.pdf]
